1 **Death is on Our Side: Paleontological Data Drastically Modify Phylogenetic**

2 **Hypotheses**

3

4 Nicolás Mongiardino Koch<sup>a\*</sup> & Luke A. Parry<sup>a</sup>

5

6 <sup>a</sup> *Department of Geology & Geophysics, Yale University, 210 Whitney Avenue, New Haven, CT 06510,*

7 *USA.*

8 \* *Corresponding author. Email: [nicolas.mongiardinokoch@yale.edu](mailto:nicolas.mongiardinokoch@yale.edu). ORCID ID: [9 \*\[0001-6317-5869\]\(https://orcid.org/0001-6317-5869\).\*](https://orcid.org/0000-</a></i></p></div><div data-bbox=)*

N Mongiardino Koch & LA Parry

10 **ABSTRACT**

11 Fossils are the only remaining evidence of the majority of species that have ever existed,  
12 providing a direct window into events in evolutionary history that shaped the diversification of life on  
13 Earth. Phylogenies underpin our ability to make sense of evolution but are routinely inferred only from  
14 data available from living organisms. Although extinct taxa have been shown to add crucial information  
15 for inferring macroevolutionary patterns and processes including ancestral states, paleobiogeography and  
16 diversification dynamics, the role that fossils play in inferring the tree of life itself is controversial. Since  
17 the early years of phylogenetic systematics, different studies have dismissed the impact of fossils due to  
18 their incompleteness, championed their ability to overturn phylogenetic hypotheses or concluded that  
19 their behavior is indistinguishable from that of extant taxa. Here we show paleontological data has a  
20 remarkable effect in phylogenetic inference. Fossils often have higher levels of topological influence than  
21 extant taxa, while inducing unique topological rearrangements. Previous studies have proposed a suite of  
22 explanations for the topological behavior of fossils, such as their retention of unique morphologies or  
23 their ability to break long branches. We develop predictive models that demonstrate that the possession of  
24 distinctive character state combinations is the primary predictor of the degree of induced topological  
25 change, and that the relative impact of taxa (fossil and extant) can be predicted to some extent before any  
26 analysis. Our results bolster the consensus of recent empirical studies by showing the unique role of  
27 paleontological data in phylogenetic inference, and provide the first quantitative assessment of its  
28 determinants, with broad consequences for the design of taxon sampling in both morphological and total-  
29 evidence analyses.

30

31 **Keywords:** phylogeny, morphology, fossils, parsimony, Bayesian.

## EXPLORING THE TOPOLOGICAL EFFECT OF FOSSILS

32           The overwhelming majority of species produced through the diversification of life on Earth are  
33 now extinct (Simpson 1952; Raup 1992). Even though much of this diversity is lost, a significant  
34 proportion has been preserved in the fossil record, which often provides the most direct evidence of  
35 evolution in deep-time. Although evolutionary inferences are routinely performed using data from extant  
36 taxa alone, this can often provide only a partial, or even misleading, view of evolutionary processes and  
37 patterns. Consequently, paleontological data can not only expand the range of evolutionary questions  
38 accessible to inquiry, but also drastically improve estimates of evolutionary phenomena. Both simulations  
39 and empirical case studies attest to the positive effect that incorporating extinct diversity can have on the  
40 reconstruction of ancestral states (Finarelli and Flynn 2006; Finarelli and Goswami 2013; Puttick 2016),  
41 rates and modes of macroevolution (Slater et al. 2012; Bokma et al. 2015; Mitchell 2015; Schnitzler et al.  
42 2017), diversification dynamics (Liow et al. 2010; Quental and Marshall 2010; Rabosky 2010; Mitchell et  
43 al. 2018) and historical biogeography (Wood et al. 2012; Field and Hsiang 2018). Fossils also provide the  
44 most direct and widely employed evidence used to time-calibrate phylogenies (Laurin 2012; Dos Reis et  
45 al. 2016), a key first step in most of modern comparative biology.

46           Despite the key role of the fossil record in understanding evolutionary history, the degree to  
47 which extinct taxa contribute to the inference of phylogenetic relationships has been much more  
48 controversial. Although this is often discussed in the context of the merits (and caveats) of reconstructing  
49 phylogeny using morphology (e.g., Scotland et al. 2003; Jenner 2004), the debate has a longer history.  
50 Hennig (1966) first suggested that the higher proportion of missing data in fossils should compromise  
51 their usefulness for elucidating phylogenetic relationships, a view shared by other early systematists  
52 (Løvtrup 1977; Ax 1987). From this perspective, fossils hold a subsidiary role, and their significance  
53 should only be discussed in light of phylogenies built from extant taxa (Patterson 1977; Nelson 1978).  
54 This assumes, either implicitly or explicitly, that fossils do not modify tree topology (Hennig 1981;  
55 Patterson 1981; Goodman 1989), and can be grafted onto phylogenies inferred using data from living  
56 species.

N Mongiardino Koch & LA Parry

57           However, extinct organisms have several characteristics that should make them especially  
58 important for inferring accurate trees from morphological data. Fossils allow taxon sampling to be  
59 extended beyond the reach of molecular data, and preserve character state combinations not present  
60 among living clades, potentially modifying homology statements, character polarity and tree rooting  
61 (Doyle and Donoghue 1987; Marshall and Schultze 1992; Novacek 1992a; Wilson 1992; Smith 1994,  
62 1998; Forey and Fortey 2001; Edgecombe 2010). Fossil terminals can also occupy unique phylogenetic  
63 positions, lying close to divergence events, in the midst of ancient and rapid radiations, or subdividing the  
64 long branches that often separate morphologically distant extant lineages (Doyle and Donoghue 1987;  
65 Gauthier et al. 1988; Donoghue et al. 1989; Huelsenbeck 1991; Sumrall 1997; Smith 1998; Wills and  
66 Fortey 2000; Smith and Turner 2005; Mayr 2006). Their morphology may often resemble that of the  
67 common ancestors from which extant clades originated, being less modified by subsequent evolutionary  
68 history (Beck and Baillie 2018; Asher et al. 2019). Furthermore, the proportion of missing data does not  
69 necessarily compromise the phylogenetic placement of terminals, nor the overall resolution of  
70 phylogenetic analyses (Kearney and Clark 2003; Wiens 2003a, b; Prevosti and Chemisquy 2010;  
71 Pattinson et al. 2014), and incomplete terminals can in fact increase topological accuracy (Huelsenbeck  
72 1991; Wiens 2005). Fossils are therefore expected to have a strong topological impact, and early claims  
73 for their dismissal were rapidly falsified by several case studies (Gauthier et al. 1988; Donoghue et al.  
74 1989; Doyle and Donoghue 1992; Novacek 1992b; Wilson 1992; Cloutier and Ahlberg 1995; Smith  
75 1998).

76           Nevertheless, it is difficult to draw general conclusions regarding the impact of paleontological  
77 data from individual studies, and it further remains unclear whether fossil terminals modify phylogenetic  
78 trees above a baseline of expected change given increased taxon sampling. The only empirical study  
79 addressing these issues analyzed 45 empirical morphological matrices and concluded that there was no  
80 significant difference in the degree of induced topological change between fossil and extant terminals  
81 (Cobbett et al. 2007). This conclusion was supported by first-order taxon jackknifing experiments (i.e.,

## EXPLORING THE TOPOLOGICAL EFFECT OF FOSSILS

82 comparison of topologies obtained with and without a focal taxon). Although the authors interpreted this  
83 result as strongly supporting the inclusion of fossils in phylogenetic analyses, this was mostly justified in  
84 the lack of a distinctive behavior by paleontological data. This conclusion not only conflicts with the  
85 literature cited above, much of which considers paleontological data to be unique (in either a negative or  
86 positive way), but also with a number of more recent studies where prominent and long-standing cases of  
87 conflict between morphological and molecular trees have been claimed to be resolved through the  
88 addition of key fossils (Legg et al. 2013; Parry et al. 2016; Coiro et al. 2018; Simões et al. 2018;  
89 Miyashita et al. 2019). However, two points should be noted regarding this discrepancy: 1) Given their  
90 experimental design, Cobbett et al. (2007) never tested the degree to which fossils overturn relationships  
91 inferred *exclusively* from living taxa, and 2) recent case studies do not necessarily claim that fossils have a  
92 strong topological effect, rather that the type of change induced is not generated by increasing sampling  
93 among extant taxa. These two aspects of the interaction between paleontological and neontological data in  
94 phylogenetic studies have never been systematically explored.

95         Given that relationships among living clades are now routinely inferred from molecular data, this  
96 discussion has been deemed obsolete (Scotland et al. 2003). However, even in the genomic era,  
97 morphology will remain the only means to resolve the relationships among extinct species, as well as  
98 their position relative to extant clades (Giribet 2015; Lee and Palci 2015). Incorporating the information  
99 preserved in the fossil record into phylogenetic frameworks not only greatly improves the behavior of  
100 phylogenetic comparative methods (Slater and Harmon 2013; Goswami et al. 2016; see above), but also  
101 allows the use of tip-dating approaches to divergence time estimation, which require fewer assumptions  
102 and make better use of stratigraphic data than more traditional node-dating methods (Ronquist et al.  
103 2012a; Heath et al. 2014; Lee and Palci 2015; Zhang et al. 2016). Furthermore, it has been shown that  
104 morphological data has the power to modify tree topology in total-evidence analyses, even when  
105 constituting a minimal fraction of the data (Wiens et al. 2010; Bapst et al. 2018; Cascini et al. 2019).  
106 Moreover, phylogenies inferred from molecular data are far from stable for all nodes in the tree of life,

N Mongiardino Koch & LA Parry

107 with several recent examples of phylogenomic data generating conflicting topologies that have sparked  
108 controversy (e.g., Ballesteros and Sharma 2019; Philippe et al. 2019). Therefore, morphological data  
109 remains an important source of independent data, and understanding the impact of including fossil taxa in  
110 phylogenetic analyses remains paramount to obtaining a complete and accurate picture of evolutionary  
111 history.

112 Here we employ multiple empirical large-scale morphological matrices to explore the degree and  
113 type of topological change exerted by fossils on trees of extant lineages. As probabilistic approaches to  
114 morphological inference have become increasingly common, we extend previous efforts by analyzing  
115 results obtained under both maximum parsimony (MP) and Bayesian inference (BI). Finally, we evaluate  
116 for the first time several potential determinants of the topological impact of taxa, allowing us to build a  
117 framework that can predict whether a terminal will have a strong effect on tree topology.

118

## 119 **MATERIALS & METHODS**

### 120 **Dataset Selection and Subsampling Procedure**

121 Datasets were selected for their size, large number of fossil and extant taxa, and relatively small  
122 proportions of missing data. We focused on large-scale empirical morphological matrices (also known as  
123 ‘phenomic’ matrices (O’Leary and Kaufman 2011; O’Leary et al. 2013)), as these are expected to  
124 generate better constrained distributions of optimal topologies. Datasets were also required to contain  
125 reasonably large numbers of both fossils and extant taxa, therefore allowing for the comparison of their  
126 topological effects. Given that some of our analyses explored the topological changes induced on trees  
127 built *only* from extant terminals, high numbers of these were especially important. Finally, fossil taxa had  
128 to be coded for a significant fraction of the total number of characters. We translated these requirements  
129 into a set of rules, employing matrices that had: 1) a number of characters larger than the number of taxa;  
130 2) at least 40 extant terminals; 3) at least 20 fossil terminals; 4) a fraction of missing data among fossils

## EXPLORING THE TOPOLOGICAL EFFECT OF FOSSILS

131 less than 80%. Six datasets (shown in Table 1 and available as SI File 1) satisfied these criteria, and were  
132 thus used for all analyses. Preliminary analyses with a larger number of datasets revealed that either the  
133 subsampling procedure or the subsequent statistical analyses (see below) could not be performed if these  
134 requirements were not enforced. In each case, a single outgroup was included to root all trees. Characters  
135 considered ordered by the authors were analyzed as such. If datasets were modified in any other way,  
136 details can be found in SI File 2.

137         Datasets were imported into the R statistical environment (R Core Team 2019) using function  
138 `ReadMorphNexus` from package *Claddis* v. 0.3 (Lloyd 2016). For each dataset, 25 initial  
139 pseudoreplicated matrices composed of  $n$  randomly selected extant taxa were generated (Fig. 1, step 1),  
140 and phylogenetic inference was performed before and after the incorporation of further terminals. Unlike  
141 previous efforts that measured the topological impact of adding individual terminals (Cobbett et al. 2007),  
142 we explored the topological effects induced by the simultaneous addition of groups of terminals (of size  
143  $m$ ) to these initial replicates (Fig. 1, step 2). We believe this approach to more accurately reflect the way  
144 in which morphological datasets grow with time, as well as providing greater subsampling flexibility and  
145 increased statistical power. The values of  $n$  and  $m$  were determined for each matrix following the  
146 approach described in SI File 2.

147         The groups of added terminals were of one of three different types: fossil, extant and  
148 pseudoextinct, with the last two providing different bases with which to compare the effects induced by  
149 fossils. The first two of these groups were generated by selecting at random among the fossil or extant  
150 taxa left unsampled. However, the direct comparison of the topological effect of fossil and extant  
151 terminals might be confounded by the systematic difference in the amount of data coded between them  
152 (see Table 1). Therefore, a third group of terminals (pseudoextinct, following the nomenclature of  
153 Springer et al. 2007) was generated by selecting at random  $m$  of the unsampled extant taxa and pairing  
154 each with a randomly selected fossil. Characters missing in the fossil were then deleted from the extant  
155 terminal with which it was paired (see Pattinson et al. 2014 for an equivalent approach). This procedure

N Mongiardino Koch & LA Parry

156 preserves the pattern of missing data found in fossils, and is expected to generate better fossil analogs  
157 compared to the deletion of random characters given how morphological structures differ in both their  
158 preservation potential and phylogenetic signal (Sansom and Wills 2013; Mounce et al. 2016; Sansom and  
159 Wills 2017; Sansom et al. 2017). Note however that the total amount of data in pseudoextinct taxa is  
160 expected to be slightly lower than that of fossils, as extant taxa already have missing data that might be  
161 coded in some fossils. Comparison of the amounts of missing data between these three groups of  
162 terminals can be found in Figure S1 (SI File 3). While fossils have on average 10.5%-30.9% more  
163 missing data than extant taxa (depending on the dataset), pseudoextinct taxa have on average 4.6%-8.5%  
164 more missing data than fossils. This represents a 2.3-4.6 times reduction in the discrepancy of missing  
165 data between compared groups. Given how missing data is known to affect the topological impact of  
166 terminals (Huelsenbeck 1991; Wiens 2003b, 2005), pseudoextinct terminals likely provide a better  
167 baseline for the topological effect that can be expected from fossils.

168 For each of the 25 initial replicates per dataset, terminals of the different types were added in a  
169 stepwise manner in groups of size  $m$  until unsampled terminals were exhausted. Furthermore, three  
170 iterations of this procedure were performed in order to estimate the average effect of taxon addition to a  
171 given taxonomic composition. This entire subsampling procedure generated between 2,275 and 3,625  
172 morphological matrices per dataset.

173

## 174 **Phylogenetic Inference**

175 Phylogenetic inference on these matrices was performed under both MP and BI (Fig. 1, step 3).  
176 Although MP was historically favored as a method of inference from morphological data, several studies  
177 have argued probabilistic approaches of inference, and more specifically BI under variants of the Mk  
178 model (Lewis 2001), might outperform parsimony-based methods (Wright and Hillis 2014; O'Reilly et al.  
179 2016; Puttick et al. 2017). These results have received different criticisms (Goloboff et al. 2018, 2019;



## EXPLORING THE TOPOLOGICAL EFFECT OF FOSSILS

180 Smith 2019), but ultimately rely on analyses performed on simulated data, under conditions where the  
181 accuracy of the inference can be evaluated. It still remains unclear whether these results can be  
182 extrapolated to the analysis of empirical matrices (Sansom et al. 2018; Schrago et al. 2018; Goloboff et al.  
183 2019), but it can be argued that they have established BI under the Mk model as a valid alternative to MP.  
184 Furthermore, given the flexibility of Bayesian methods to combine different data sources and calibrate  
185 divergence times, BI of morphological datasets is likely to become common in the future. We here treat  
186 these as valid methods of inference from morphological data and explore whether any of our results varies  
187 depending on method choice, extending previous attempts which had relied exclusively on MP (Cobbett  
188 et al. 2007).

189 Inference under MP was performed using TNT 1.5 (Goloboff and Catalano 2016) under equal  
190 weights, using driven tree searches with five initial replicates that were subject to new technology search  
191 heuristics (Goloboff 1999; Nixon 1999). Search was continued until minimum length was found twenty  
192 times. TBR branch swapping was then performed on the topologies in memory, retaining a maximum of  
193 10,000 maximum parsimony trees (an example TNT batch script to perform tree searches can be found as  
194 SI File 4). Bayesian analyses were performed in MrBayes 3.2.6 (Ronquist et al. 2012b) under the Mk+ $\Gamma$   
195 model with a correction for coding only parsimony-informative characters (MK<sub>parsinf</sub>). Two runs of four  
196 Metropolis-coupled MCMC chains were continued for either one million generations or until a standard  
197 deviation of split frequencies  $< 0.01$  was attained. We considered this condition to represent an accurate  
198 sampling of the posterior distribution of topologies (as have other authors; e.g., Puttick et al. 2019). Trees  
199 were sampled every 100 generations and the initial 50% was discarded as burn-in, therefore retaining a  
200 maximum of 10,000 posterior topologies.

201

## 202 **Estimating and Analyzing Topological Impact**

N Mongiardino Koch & LA Parry

203 Optimal topologies from MP and BI runs were imported into R using functions from packages  
204 *ape* (Paradis and Schliep 2018) and *TNTR* (Matzke 2015), and a random sample of up to 100 topologies  
205 was drawn from each analysis. Topologies before and after the addition of groups of taxa were compared  
206 directly by calculating their normalized Robinson-Foulds (RF) distance (Robinson and Foulds 1981) after  
207 pruning to the same taxonomic composition (Fig. 1, step 4 and 5). All trees analyzed were thus fully  
208 bifurcating, avoiding the issue of computing similarity when topologies differ in their level of resolution  
209 (Smith 2019). For pairs of unrooted bifurcating trees the RF distance is equivalent to the number of  
210 bipartitions not shared (Penny and Hendy 1985), and was normalized to the total number of bipartitions in  
211 both. RF distances were computed using package *phangorn* v. 2.5.5 (Schliep 2011). In order to derive a  
212 single metric that reflects the distance between sets of trees, we measured both the mean and minimum  
213 RF distance of a given tree to all trees in the other set, and took the average of the resulting values. Given  
214 the strong linear correlation between these two estimates (Fig. S2 of SI File 3; all Pearson's  $r > 0.89$ ,  $P <$   
215  $10^{-259}$ ), analyses employed the average of distances to the nearest neighbor. This metric was favored as it  
216 attains a value of 0 if the sets being compared are identical (Cobbett et al. 2007), and allows for a more  
217 straightforward comparison of sets of trees derived from MP and BI, which are expected to systematically  
218 differ in their within-set distances (O'Reilly et al. 2016; Schrago et al. 2018).

219 We explored the degree of topological change generated by taxon addition by summarizing RF  
220 distances across iterations and analyzing them with generalized linear models. The effect produced by the  
221 incorporation of fossils to topologies of extant taxa was compared in multiple ways with that introduced  
222 by further increasing sampling of extant taxa. First, we used the number (log-transformed) and type  
223 (fossil/extant/pseudoextinct) of added terminals as predictors of topological change. Extant and  
224 pseudoextinct terminals provided two alternative baselines of topological change introduced by increasing  
225 taxon sampling, and so the relative effect of these was compared to that of fossils by fitting separate linear  
226 models. However, as already explained, this approach can be problematic as the proportion of missing  
227 data differs between these types of terminals (Fig. S1 of SI File 3). To more directly account for this, a

## EXPLORING THE TOPOLOGICAL EFFECT OF FOSSILS

228 second analysis was performed using the amount of added information (i.e., the sum of the number of  
229 coded characters across added terminals, also log-transformed) as the continuous predictor in the linear  
230 model. Given that this approach fully accounts for differences in the amount of coded characters, only  
231 data for fossil and extant terminals was analyzed in such a way.

232 In each case, models with and without an interaction term were further compared using likelihood  
233 ratio tests (LRTs) with a significance level ( $\alpha$ ) of 0.1. In case of a significant interaction term, regions of  
234 significance were estimated using the Johnson-Neyman approach with package *jnt* (Middleton 2016);  
235 otherwise results presented are those of ANCOVAs. The Johnson-Neyman procedure finds the values of  
236 the continuous predictor for which there is a transition from significant to non-significant differences  
237 among the groups of the categorical predictor. In cases of non-significant differences between the  
238 different types of added terminals, a power analysis using the method of Borm et al. (2007) was  
239 performed (with a standard power level of 0.8).

240 Finally, we also relied on the construction of treespace (Hillis et al. 2005) to explore the type of  
241 topological change exerted by the addition of extant and fossil taxa. This approach is based on estimating  
242 all pairwise RF distances and decomposing them into a two-dimensional space using principal coordinate  
243 analysis (PCoA) (Jombart et al. 2017), providing a summary of the diversity of optimal topologies that  
244 are obtained as different types of terminals are incorporated into the inference procedure. Given the  
245 combinatorial nature of this method, we further subsampled at most 20 trees per analysis, and did not  
246 include topologies obtained after the addition of pseudoextinct terminals. Different treespaces were built  
247 for each combination of dataset, inference method and initial replicate. After obtaining the location of  
248 each tree in the first two PCoA axes, sets of trees from different phylogenetic analyses were collapsed to  
249 their centroid, and the relative position of centroids generated by the addition of fossil and extant  
250 terminals were compared using convex hulls and permutational (non-parametric) MANOVAs. Convex  
251 hulls provide a straightforward way in which to estimate the degree to which fossil and extant taxon  
252 addition results in the exploration of similar regions of treespace. Topological similarity was expressed as

N Mongiardino Koch & LA Parry

253 the area of overlap between the two convex hulls divided by the sum of the total area covered by the two,  
254 calculated using package *geometry* (Habel et al. 2019). Permutational MANOVA (Anderson 2001) is an  
255 analysis of variance using distance matrices, and employs a permutational test to evaluate significant  
256 sources of variation. The test was run for each treespace individually with package *vegan* (Oksanen et al.  
257 2019), using Euclidean distances and evaluating significance with 10,000 replicates.

258         Given that the 25 initial replicates of each dataset do not share the same taxonomic composition,  
259 and therefore cannot be placed in a common treespace, a visual summary per dataset was obtained by  
260 using Procrustes superimposition. The different treespaces of each dataset were rotated so as to minimize  
261 the sum of squared distances between centroids obtained after adding the same number and type of  
262 terminals across replicates. In order to further facilitate interpretation of the plots, the different treespaces  
263 were then translated so that the average position of trees produced before taxon addition was at the origin.

264

## 265 **Estimating and Analyzing Taxon Influence**

266         We also analyzed the topological effect induced by individual taxa using first-order taxon  
267 jackknifing. Unlike previous efforts however (Cobbett et al. 2007; Mariadassou et al. 2012; Denton and  
268 Goolsby 2018), we first standardized the size of the matrices from which taxa were jackknifed. We  
269 consider this approach to be superior for multiple reasons. First of all, it is evident from our results (as  
270 well as from previous analyses; e.g., Huelsenbeck 1991; Wiens 2003b, 2005; Prevosti and Chemisquy  
271 2010) that the topological impact of a taxon will strongly depend on the size of the dataset to which it is  
272 added (see Results). If differences in size across datasets are not accounted for, these are bound to distort  
273 the impact of taxa when combining results from different datasets. Furthermore, standardizing matrix size  
274 has the added benefit that the impact of taxa can be measured against different taxonomic backgrounds.  
275 The resulting average impact is likely to be a better predictor of the effect a taxon will exert if

## EXPLORING THE TOPOLOGICAL EFFECT OF FOSSILS

276 incorporated into a new morphological matrix. Finally, it also allows for more intense replication and  
277 increased statistical power, while avoiding prohibitive computational times.

278 For each taxon, 30 matrices composed of the outgroup and 38 other randomly selected ingroup  
279 taxa were built. Unlike the approach described above, this subsampling scheme produces matrices  
280 composed of a mix of extinct and extant terminals. Phylogenetic inference was performed before and after  
281 the addition of the focal taxon to each of these matrices. A total of 27,930 MP and BI analyses were  
282 performed. Both phylogenetic inference and estimation of topological impact were performed as  
283 explained above. The impact of taxa under BI and MP was significantly correlated (Pearson's  $r = 0.40$ ,  $p$   
284  $< 10^{-16}$ , Figs. S3 of SI File 3). Topological impact was then averaged across replicates to obtain a single  
285 measure per taxon. Given that we found a very strong structuring of topological impact by dataset (Figs.  
286 S4 and S5 of SI File 3), we subtracted from the estimated impact of each taxon the average impact for its  
287 dataset of provenance. This rescaling produces a metric that expresses deviations from an average impact  
288 and accounts for the difference in stability across datasets.

289 Generalized linear models were again employed to survey potential determinants of topological  
290 impact. We attempted to quantify all possible determinants previously hypothesized in the literature to  
291 affect a taxon's topological impact. Some of these properties were estimated directly from the  
292 morphological matrices, while others were measured on BI posterior topologies (as they required branch  
293 lengths). From the matrices, we measured the proportion of missing/inapplicable data and two measures  
294 of morphological distance, which we refer to as 'distinctiveness' and 'uniqueness'. These correspond to  
295 the minimum and average morphological distance to all other taxa, respectively, and were estimated using  
296 the maximum observable rescaled distance (Lloyd 2016). Among the tree-based metrics we quantified—  
297 for each focal taxa—the patristic distance to the root of the tree ('primitiveness'), the length of its  
298 terminal branch ('autapomorphies'), as well as three measures designed to capture different conditions  
299 that might lead to long-branch attraction scenarios. These included the change induced by the focal taxon  
300 on the mean and variance of branch lengths, as well as the variance of root-to-tip distances ('clock-

N Mongiardino Koch & LA Parry

301 likeness'). Models also included the taxon type (fossil/extant) as an additional predictor. Further details  
302 on how these measures were quantified can be found in SI File 2. In order to explore the relevance of  
303 these predictors, stepwise variable selection in both directions was performed, once again comparing  
304 models using LRTs with  $\alpha = 0.1$ .

305 Finally, we also explored the determinants of topological impact using random forest models.  
306 Random forests were chosen given their robustness to multicollinearity and deviations from normality, as  
307 well as their ability to accommodate non-linear and local relationships. Both the entire set of independent  
308 variables and the subset that can be estimated without running a phylogenetic analysis (i.e., all three  
309 matrix-based variables and the taxon's type) were employed. These were used as predictors of both the  
310 topological impact score (regression forest), as well as a recoded binary variable grouping taxa into those  
311 with above and below average impact (classification forest). Models were fit using package  
312 *randomForest* (Liaw and Wiener 2002), growing 5,000 trees and estimating accuracy of prediction using  
313 out-of-bag errors. The number of predictors tried at each step was automatically determined by the  
314 algorithm.

315 R code to perform all of the procedures detailed above (other than phylogenetic inference) and  
316 perform the statistical analyses is available as SI File 5. It can be used to replicate all stages of the study  
317 alongside SI File 1 (original datasets) and SI File 6 (which contains all results).

318

## 319 **RESULTS**

320 Our results show that the average degree of induced topological change strongly depends on the  
321 logarithm of the amount of information added to the analysis, measured as either the number of taxa or  
322 the number of coded cells incorporated to the matrix (Figs. 2, 3 and S6 of SI File 3; linear regressions, all  
323  $R^2 > 0.86$ ,  $P < 8e-5$ ). As the taxonomic sampling of phylogenetic analyses increases, it becomes  
324 progressively less likely that new data will further modify tree topology. The relative effect of adding new

## EXPLORING THE TOPOLOGICAL EFFECT OF FOSSILS

325 extant or fossil terminals proved highly dependent on the dataset, method of inference and number of  
326 added taxa (Fig. 2), although there was an overall stronger evidence for the addition of extant taxa  
327 generating higher topological impacts. Six of twelve analyses performed (i.e., combinations of datasets  
328 and inference procedures) showed a significantly higher impact of extant taxa across most/all of the range  
329 analyzed, while the opposite was only true for one analysis (echinoid dataset under BI; see also Fig. S6 of  
330 SI File 3). In stark contrast, fossil terminals had a significantly higher topological effect than  
331 pseudoextinct terminals, across all matrices and methods of inference (Fig. 3). This discordance reveals  
332 the strong relationship between topological impact and levels of missing data, and questions whether  
333 fossil and extant terminals are directly comparable.

334 For this comparison to be meaningful, statistical models need to account for the fact that fossil  
335 and extant terminals do not contain equivalent amounts of information (see Table 1 and Fig. S1 of SI File  
336 3). One possible way of achieving this is to compare the topological effect induced by the addition of  
337 paleontological and neontological data (rather than the number of terminals) to the inference procedure.  
338 We defined this variable as the sum of the number of characters that were neither missing nor  
339 inapplicable across the added terminals. From this perspective, differences in the behavior of these types  
340 of data are evident, with four matrices showing a stronger topological impact of paleontological data and  
341 two (Coccoomorpha and Panarthropoda) a stronger effect of neontological data (Fig. 4). No systematic  
342 difference was found between the results obtained for MP and BI, which were very similar across  
343 datasets. The sole difference found was the behavior of the different types of data for the lemuriform  
344 dataset, which proved significant under BI but not under MP. This likely stems from a lack of statistical  
345 power, as this is the dataset with the smallest number of taxa, and therefore the fewest datapoints. In fact,  
346 a power analysis revealed significance should be attained with an increase of 16% in sample size. The  
347 lack of significance is therefore not given much weight, especially as the relative effects of  
348 paleontological and neontological data are the same for both inference procedures.

N Mongiardino Koch & LA Parry

349 We further compared the generated topologies through the use of treespaces, allowing us to  
350 explore the type of topological change induced by fossils and test if it systematically differed from that  
351 generated through the addition of further extant terminals (Fig. 5). As the trees obtained from the multiple  
352 replicates performed on each dataset do not share the same terminals (see Fig. 1 and Materials &  
353 Methods) and therefore cannot be represented in a common treespace, each panel of Figure 5 consists of  
354 the optimal juxtaposition of multiple distinct treespaces. The almost complete lack of overlap between the  
355 clouds of dots seen in Figure 5 is therefore even more pronounced if individual treespaces are scrutinized  
356 individually. Among these, convex hulls for topologies obtained after extant and fossil addition were  
357 completely disjunct 19.3% of the time, and otherwise showed an average overlap of only 9.8% of the total  
358 area covered. In fact, the relative positions occupied by these topologies were significantly different in  
359 95% of the cases (permutational MANOVA,  $p < 0.05$ ), with 13 of the 15 non-significant differences  
360 restricted to the MP analysis of the panarthropod dataset.

361 It is evident from this suite of analyses that fossil taxa have a unique behavior in phylogenetic  
362 inference (Figs. 2-5). However, this result raises the question of what determines the topological impact  
363 of a taxon. To address this question, we resorted to first-order taxon jackknifing experiments, extending  
364 previous efforts by assessing the topological effect of each terminal on multiple smaller matrices of the  
365 same size and composed of randomly sampled extant and fossil taxa (see Materials & Methods). In  
366 complete agreement with previous results (Cobbett et al. 2007), we found very small differences between  
367 fossil and extant terminals in their relative effects on topology. The type of terminal (fossil/extant) was  
368 not a significant predictor of topological impact for BI ( $t$ -test,  $p = 0.91$ ), while fossils had a slightly  
369 smaller than expected impact under MP ( $p = 0.04$ ). This result was mostly driven by the mammal dataset,  
370 the only individual matrix for which differences were significant ( $p = 0.001$ ). However, this approach  
371 once again relies on comparing groups of terminals that systematically differ in their proportion of  
372 missing data (Table 1, Fig. S1 of SI File 3). After accounting for this difference, fossils were shown to  
373 impact topology significantly more than extant terminals above a threshold of 43-45% missing data



## EXPLORING THE TOPOLOGICAL EFFECT OF FOSSILS

374 (depending on the method of inference, Fig. 6a and Fig. S7 of SI File 3), a condition satisfied by over  
375 78% of fossils in our dataset. Extant taxa are expected to have a significantly higher impact than fossils  
376 only in the very narrow condition of no missing data (although this requires extrapolation, and holds true  
377 only for MP, see Fig. S7 of SI File 3).

378 We quantified several other matrix and tree-based properties of terminals and explored their  
379 usefulness as predictors of topological impact using generalized linear models. The obtained best-fit  
380 models under BI and MP were extremely similar, yet explained widely different proportions of total  
381 variance (adjusted  $R^2$  of 0.06 and 0.31, respectively). For this reason we focus here only on the results for  
382 MP. All of the results obtained under BI are placed in SI File 3, and a discussion of the differences  
383 between methods can be found in SI File 2.

384 Our analysis revealed the presence of atypical morphologies as a major driver in a taxon's  
385 topological impact (Figs. 6b and S8 of SI File 3). Organisms displaying character state combinations  
386 distinct from those of all other taxa strongly modified topology, while completely unique morphologies  
387 had a significantly lower impact. The amount of missing data and the degree of evolutionary change also  
388 had negative effects, with taxa displaying 'primitive' morphologies (i.e., those inferred to have undergone  
389 the least amount of change since the last common ancestor of the ingroup) and possessing fewer  
390 autapomorphies having stronger effects on topology. Furthermore, terminals that increased the average  
391 branch length of trees and decreased the clock-likeness of morphological evolution also showed a higher  
392 impact. It is possible that these taxa are generating conditions conducive to long-branch attractions.  
393 Finally, even after accounting for the aforementioned variables, fossils still induced stronger topological  
394 changes than extant taxa, suggesting that the peculiarities of paleontological data are still not completely  
395 captured by our model.

396 The topological impact of terminals has been claimed to be unpredictable (Cobbett et al. 2007),  
397 yet to our knowledge no attempt at directly predicting it has been performed. Given how random forest  
398 models using the same set of predictors were able to explain an even higher proportion of variance than

N Mongiardino Koch & LA Parry

399 linear models (44% in the case of MP, see Table S1 of SI File 7), we tested the accuracy of random  
400 forests to predict whether a taxon had a higher or lower-than-average topological impact. Prediction was  
401 carried out using only the set of four variables that are tree-independent and can therefore be estimated  
402 before running a phylogenetic analysis (distinctiveness, uniqueness, proportion of missing data and type  
403 of taxon). Even using this reduced set of variables, the model attained a classification accuracy of 72%  
404 (Table S2 of SI File 7), indicating that the topological impact of taxa in morphological phylogenetic  
405 analysis has a strongly predictable component.

406

## 407 **DISCUSSION**

408 For decades, systematists have disagreed on the relevance that the fossil record has for inferring  
409 phylogenetic relationships. By focusing on just a few of the many ways in which paleontological and  
410 neontological data differ, fossils were portrayed to be either vital or irrelevant for phylogenetic inference,  
411 as well as everything in between. However, much of this discussion was based on either first principles or  
412 individual case studies. The only attempt to systematically assess the relevance of fossils suggested that  
413 differences in the behavior of extant and extinct taxa might have been exaggerated, and that fossils do not  
414 differ systematically from extant terminals, at least not in terms of their average topological effect.

415 Our results are able to reconcile these seemingly incompatible claims about the nature of the  
416 fossil record and its relevance for systematics. All of our analyses reinforce the idea that the information  
417 preserved in the morphology of extinct organisms is unlike data that can be obtained from the study of  
418 living species, and that its inclusion in phylogenetic inference has strong consequences. However, this is  
419 evident only after the fragmentary nature of fossils is accounted for. Missing data does in fact affect  
420 topological impact (Fig. 6a), something that had already been demonstrated through simulations  
421 (Huelsenbeck 1991; Wiens 2003b, 2005), although not always confirmed using empirical datasets  
422 (Denton and Goolsby 2018). While previous studies had directly compared fossil and extant taxa, a better

## EXPLORING THE TOPOLOGICAL EFFECT OF FOSSILS

423 understanding of their behavior required accounting for the different amount of information they contain.  
424 When this is done, paleontological data tends to have stronger topological effects than neontological data  
425 (Figs. 2-4, 6, S6-S8). Furthermore, adding fossils induces topological changes that are never obtained  
426 through better taxonomic sampling of extant taxa (Fig. 5), a phenomenon that likely underlies their ability  
427 to resolve conflicts between morphological and molecular phylogenies (Legg et al. 2013; Beck and  
428 Baillie 2018; Simões et al. 2018; Asher et al. 2019).

429         Why do fossils show such a remarkable effect on phylogenetic analysis? Our results show  
430 morphological distinctiveness to be the main predictor of topological impact (Figure 6b). The fossil  
431 record contains a wealth of examples of extinct organisms with morphologies wholly unlike those we see  
432 in the modern biosphere, and whose appearance we would not be able to predict even with the closest  
433 scrutiny of the morphology of extant taxa. Examples of such organisms are found throughout geological  
434 time, from the ‘weird wonders’ of the Cambrian to the diversity of extinct archosaurs that populate the  
435 stem lineage of birds. The unique combination of characters in such organisms has long been recognized  
436 to modify character polarity, reveal hidden homoplasies (or cryptic homologies) and break long branches  
437 by revealing the sequence of character acquisition (Gauthier et al. 1988; Donoghue et al. 1989; Smith  
438 1998; Edgecombe 2010). However, taxa with completely unique morphologies exhibit decreased  
439 topological impact, likely attaching to a topology without modifying character optimization. In such cases  
440 of extreme morphological modifications, such as those separating hexapods and crustaceans (Legg et al.  
441 2013), or cetaceans from their ungulate relatives (Spaulding et al. 2009), fossil stem groups with  
442 intermediate morphologies are required to correctly articulate these clades. Finally, the fossil record  
443 provides our only access to morphologies that lie close to the origin of ancient lineages and are less  
444 burdened by character state changes imposed by subsequent evolutionary history, properties that further  
445 increase the topological impact of individual taxa.

446         Fossils not only play a critical role when inferring evolutionary processes from phylogenetic trees  
447 (Slater et al. 2012; Goswami et al. 2016), but are clearly also influential in the construction of the trees

N Mongiardino Koch & LA Parry

448 themselves. Beyond recognizing the unique role of paleontological data in phylogenetic inference, our  
449 analyses prove that topological impact has strong determinants. Consideration of these properties can  
450 provide new ways for optimizing the phylogenetic design of total-evidence analyses, aiding in the  
451 generation of phylogenies that better incorporate the vast records of evolutionary history preserved in the  
452 morphology of extant and extinct lineages. Given that genomic data is yet to resolve a stable phylogeny  
453 for all branches in the tree of life, phylogenetic analyses of morphology incorporating fossil taxa remain  
454 an important and independent framework for unraveling evolutionary history.

455

#### 456 **SUPPLEMENTARY MATERIAL**

457 Data available from the Dryad Digital Repository: [http://dx.doi.org/10.5061/dryad.\[NNNN\]](http://dx.doi.org/10.5061/dryad.[NNNN]).

458

#### 459 **ACKNOWLEDGEMENTS**

460 This manuscript was enriched by discussions with Jacques A. Gauthier, Michael J. Landis, Michael  
461 J. Donoghue and Derek E. G. Briggs. We would also like to thank Kaylea Nelson for computational  
462 assistance.

463

#### 464 **AUTHOR CONTRIBUTIONS**

465 NMK designed the study and wrote all code. NMK and LAP gathered the original datasets and ran  
466 the analyses. NMK analyzed the data and wrote the manuscript with contributions from LAP.

467

#### 468 **COMPETING INTERESTS**

469 The authors declare no competing financial interests.

## EXPLORING THE TOPOLOGICAL EFFECT OF FOSSILS

### 470 LITERATURE CITED

- 471 Anderson M.J. 2001. A new method for non-parametric multivariate analysis of variance. *Austral Ecol.*  
472 26:32-46.
- 473 Asher R.J., Smith M.R., Rankin A., Emry R.J. 2019. Congruence, fossils and the evolutionary tree of  
474 rodents and lagomorphs. *Roy. Soc. Open Sci.* 6:190387.
- 475 Ax P. 1987. *The phylogenetic system: the systematization of organisms on the basis of their*  
476 *phylogenesis.* New York, John Wiley & Sons.
- 477 Ballesteros J.A., Sharma P.P. A Critical Appraisal of the Placement of Xiphosura (Chelicerata) with  
478 Account of Known Sources of Phylogenetic Error. *Syst. Biol.* syz011,  
479 <https://doi.org/10.1093/sysbio/syz011>.
- 480 Bapst D.W., Schreiber H.A., Carlson S.J. 2018. Combined Analysis of Extant Rhynchonellida  
481 (Brachiopoda) Using Morphological and Molecular Data. *Syst. Biol.* 67:32-48.
- 482 Beck R.M., Baillie C. 2018. Improvements in the fossil record may largely resolve current conflicts  
483 between morphological and molecular estimates of mammal phylogeny. *Proc. Roy. Soc. B Biol. Sci.*  
484 285:20181632.
- 485 Bokma F., Godinot M., Maridet O., Ladevèze S., Costeur L., Solé F., Gheerbrant E., Peigné S., Jacques  
486 F., Laurin M. 2015. Testing for Depéret's rule (body size increase) in mammals using combined extinct  
487 and extant data. *Syst. Biol.* 65:98-108.
- 488 Borm G.F., Fransen J., Lemmens W.A. 2007. A simple sample size formula for analysis of covariance in  
489 randomized clinical trials. *J. Clin. Epidemiol.* 60:1234-1238.
- 490 Cascini M., Mitchell K.J., Cooper A., Phillips M.J. 2019. Reconstructing the Evolution of Giant Extinct  
491 Kangaroos: Comparing the Utility of DNA, Morphology, and Total Evidence. *Syst. Biol.* 68:520-537.
- 492 Cloutier R., Ahlberg P.E. 1995. Sarcopterygian interrelationships: how far are we from a phylogenetic  
493 consensus? *Geobios* 28:241-248.

N Mongiardino Koch & LA Parry

- 494 Cobbett A., Wilkinson M., Wills M.A. 2007. Fossils impact as hard as living taxa in parsimony analyses  
495 of morphology. *Syst. Biol.* 56:753-766.
- 496 Coiro M., Chomicki G., Doyle J.A. 2018. Experimental signal dissection and method sensitivity analyses  
497 reaffirm the potential of fossils and morphology in the resolution of the relationship of angiosperms and  
498 Gnetales. *Paleobiology* 44:490-510.
- 499 Denton J.S., Goolsby E.W. 2018. Measuring inferential importance of taxa using taxon influence indices.  
500 *Ecol. Evol.* 8:4484-4494.
- 501 Donoghue M.J., Doyle J.A., Gauthier J.A., Kluge A.G., Rowe T. 1989. The importance of fossils in  
502 phylogeny reconstruction. *Annu. Rev. Ecol. Syst.* 20:431-460.
- 503 Dos Reis M., Donoghue P.C., Yang Z. 2016. Bayesian molecular clock dating of species divergences in  
504 the genomics era. *Nat. Rev. Genet.* 17:71.
- 505 Doyle J.A., Donoghue M.J. 1987. The importance of fossils in elucidating seed plant phylogeny and  
506 macroevolution. *Rev. Palaeobot. Palynol.* 50:63-95.
- 507 Doyle J.A., Donoghue M.J. 1992. Fossils and seed plant phylogeny reanalyzed. *Brittonia* 44:89.
- 508 Edgecombe G.D. 2010. Palaeomorphology: fossils and the inference of cladistic relationships. *Acta Zool.*  
509 91:72-80.
- 510 Field D.J., Hsiang A.Y. 2018. A North American stem turaco, and the complex biogeographic history of  
511 modern birds. *BMC Evol. Biol.* 18:102.
- 512 Finarelli J.A., Flynn J.J. 2006. Ancestral state reconstruction of body size in the Caniformia (Carnivora,  
513 Mammalia): the effects of incorporating data from the fossil record. *Syst. Biol.* 55:301-313.
- 514 Finarelli J.A., Goswami A. 2013. Potential pitfalls of reconstructing deep time evolutionary history with  
515 only extant data, a case study using the Canidae (Mammalia, Carnivora). *Evolution* 67:3678-3685.
- 516 Forey P., Fortey R. 2001. Fossils in the reconstruction of phylogeny. In: *Palaeobiology II*. Briggs DEG,  
517 Crowther PR. Eds. Blackwell Science, p. 515-519.
- 518 Gauthier J., Kluge A.G., Rowe T. 1988. Amniote phylogeny and the importance of fossils. *Cladistics*  
519 4:105-209.

## EXPLORING THE TOPOLOGICAL EFFECT OF FOSSILS

- 520 Gauthier J.A., Kearney M., Maisano J.A., Rieppel O., Behlke A.D. 2012. Assembling the squamate tree  
521 of life: perspectives from the phenotype and the fossil record. *Bull. Peabody Mus. Nat. Hist.* 53:3-308.
- 522 Giribet G. 2015. Morphology should not be forgotten in the era of genomics—a phylogenetic perspective.  
523 *Zool. Anz.* 256:96-103.
- 524 Goloboff P.A. 1999. Analyzing large data sets in reasonable times: solutions for composite optima.  
525 *Cladistics* 15:415-428.
- 526 Goloboff P.A., Catalano S.A. 2016. TNT version 1.5, including a full implementation of phylogenetic  
527 morphometrics. *Cladistics* 32:221-238.
- 528 Goloboff P.A., Pittman M., Pol D., Xu X. 2019. Morphological Data Sets Fit a Common Mechanism  
529 Much More Poorly than DNA Sequences and Call Into Question the Mkv Model. *Syst. Biol.* 68:494-504.
- 530 Goloboff P.A., Torres A., Arias J.S. 2018. Weighted parsimony outperforms other methods of  
531 phylogenetic inference under models appropriate for morphology. *Cladistics* 34:407-437.
- 532 Goodman M. 1989. Emerging alliance of phylogenetic systematics and molecular biology: a new age of  
533 exploration. In: *The Hierarchy of Life*. Fernholm B., Bremer K., Jornvall H. Eds. Amsterdam: Elsevier  
534 Science Publishers, p. 43-61.
- 535 Goswami A., Mannion P.D., Benton M.J. 2016. Radiation and extinction: investigating clade dynamics in  
536 deep time. *Biol. J. Linn. Soc.* 118:6-12.
- 537 Habel K., Grasman R., Gramacy R.B., Mozharovskiy P., Sterratt D.C. 2019. geometry: Mesh Generation  
538 and Surface Tessellation. R package version 0.4.1. <https://CRAN.R-project.org/package=geometry>.
- 539 Heath T.A., Huelsenbeck J.P., Stadler T. 2014. The fossilized birth–death process for coherent calibration  
540 of divergence-time estimates. *Proc. Natl. Acad. Sci USA* 111:E2957-E2966.
- 541 Hennig W. 1966. *Phylogenetic Systematics*. Urbana: Univ. Illinois Press.
- 542 Hennig W. 1981. *Insect phylogeny*. John Wiley & Sons Ltd.
- 543 Herrera J.P., Dávalos L.M. 2016. Phylogeny and divergence times of lemurs inferred with recent and  
544 ancient fossils in the tree. *Syst. Biol.* 65:772-791.
- 545 Hillis D.M., Heath T.A., John K.S. 2005. Analysis and visualization of tree space. *Syst. Biol.* 54:471-482.

N Mongiardino Koch & LA Parry

- 546 Huelsenbeck J.P. 1991. When are fossils better than extant taxa in phylogenetic analysis? *Syst Biol.*  
547 40:458-469.
- 548 Jenner R.A. 2004. Accepting partnership by submission? Morphological phylogenetics in a molecular  
549 millennium. *Syst. Biol.* 53:278-298.
- 550 Jombart T., Kendall M., Almagro-Garcia J., Colijn C. 2017. treespace: statistical exploration of  
551 landscapes of phylogenetic trees. *Mol. Ecol. Res.* 17:1385-1392.
- 552 Kearney M., Clark J.M. 2003. Problems due to missing data in phylogenetic analyses including fossils: a  
553 critical review. *J. Vert. Paleontol.* 23:263-274.
- 554 Kroh A., Smith A.B. 2010. The phylogeny and classification of post-Palaeozoic echinoids. *Journal of*  
555 *Syst. Palaeontol.* 8:147-212.
- 556 Laurin M. 2012. Recent progress in paleontological methods for dating the Tree of Life. *Front Genet.*  
557 3:130.
- 558 Lee M.S, Palci A. 2015. Morphological phylogenetics in the genomic age. *Curr. Biol.* 25:R922-R929.
- 559 Legg D.A., Sutton M.D., Edgecombe G.D. 2013. Arthropod fossil data increase congruence of  
560 morphological and molecular phylogenies. *Nat Comm.* 4:2485.
- 561 Lewis P.O. 2001. A likelihood approach to estimating phylogeny from discrete morphological character  
562 data. *Syst. Biol.* 50:913-925.
- 563 Liaw A., Wiener M. 2002. Classification and Regression by randomForest. *R News*, 2:18-22.
- 564 Liow L.H., Quental T.B., Marshall C.R. 2010. When can decreasing diversification rates be detected with  
565 molecular phylogenies and the fossil record? *Syst. Biol.* 59:646-659.
- 566 Lloyd G.T. 2016. Estimating morphological diversity and tempo with discrete character-taxon matrices:  
567 implementation, challenges, progress, and future directions. *Biol. J. Linn. Soc.* 118:131-151.
- 568 Løvtrup S. 1977. *The phylogeny of Vertebrata*. London: John Wiley & Sons.
- 569 Mariadassou M., Bar-Hen A., Kishino H. 2012. Taxon influence index: assessing taxon-induced  
570 incongruities in phylogenetic inference. *Syst. Biol.* 61:337-345.



## EXPLORING THE TOPOLOGICAL EFFECT OF FOSSILS

- 571 Marshall C., Schultze H.-P. 1992. Relative importance of molecular, neontological, and paleontological  
572 data in understanding the biology of the vertebrate invasion of land. *J. Mol. Evol.* 35:93-101.
- 573 Matzke N.J. 2015. TNTR: R functions to aid analyses in the cladistics program TNT. Available online at  
574 PhyloWiki: <http://phylo.wikidot.com/tntr>.
- 575 Mayr G. 2006. The contribution of fossils to the reconstruction of the higher-level phylogeny of birds.  
576 *Species, Phylogeny and Evolution* 1:59-64.
- 577 Middleton K. 2016. jnt: Johnson-Neyman Technique. R package version 0.4.
- 578 Mitchell J.S. 2015. Extant-only comparative methods fail to recover the disparity preserved in the bird  
579 fossil record. *Evolution* 69:2414-2424.
- 580 Mitchell J.S., Etienne R.S., Rabosky D.L. 2018. Inferring diversification rate variation from phylogenies  
581 with fossils. *Syst. Biol.* 68:1-18.
- 582 Miyashita T., Coates M.I., Farrar R., Larson P., Manning P.L., Wogelius R.A., Edwards N.P., Anné J.,  
583 Bergmann U., Palmer A.R. 2019. Hagfish from the Cretaceous Tethys Sea and a reconciliation of the  
584 morphological–molecular conflict in early vertebrate phylogeny. *Proc. Natl. Acad. Sci. USA* 116:2146-  
585 2151.
- 586 Mongiardino Koch N., Gauthier J.A. 2018. Noise and biases in genomic data may underlie radically  
587 different hypotheses for the position of Iguania within Squamata. *PLoS One* 13:e0202729.
- 588 Mounce R.C., Sansom R., Wills M.A. 2016. Sampling diverse characters improves phylogenies:  
589 craniodental and postcranial characters of vertebrates often imply different trees. *Evolution* 70:666-686.
- 590 Nelson G. 1978. Ontogeny, phylogeny, paleontology, and the biogenetic law. *Syst. Zool.* 27:324-345.
- 591 Nixon K.C. 1999. The parsimony ratchet, a new method for rapid parsimony analysis. *Cladistics* 15:407-  
592 414.
- 593 Novacek M.J. 1992a. Fossils as critical data for phylogeny. In: *Extinction and Phylogeny*. Novacek M.,  
594 Wheeler Q. Eds. Columbia University Press, p. 46-88.
- 595 Novacek M.J. 1992b. Fossils, topologies, missing data, and the higher level phylogeny of eutherian  
596 mammals. *Syst. Biol.* 41:58-73.

N Mongiardino Koch & LA Parry

- 597 O’Leary M.A., Bloch J.I., Flynn J.J., Gaudin T.J., Giallombardo A., Giannini N.P., Goldberg S.L., Kraatz  
598 B.P., Luo Z.-X., Meng J. 2013. The placental mammal ancestor and the post–K-Pg radiation of placentals.  
599 *Science* 339:662-667.
- 600 O’Leary M.A., Kaufman S. 2011. MorphoBank: phylophenomics in the “cloud”. *Cladistics* 27:529-537.
- 601 O’Reilly J.E., Puttick M.N., Parry L.A., Tanner A.R., Tarver J.E., Fleming J., Pisani D., Donoghue P.C.  
602 2016. Bayesian methods outperform parsimony but at the expense of precision in the estimation of  
603 phylogeny from discrete morphological data. *Biol. Lett.* 12:20160081.
- 604 Oksanen J., Blanchet F.G., Friendly M., Kindt R., Legendre P., McGlenn D., Minchin P.R., O’Hara R.B.,  
605 Simpson G.L., Solymos P., Stevens M.H.H., Szoecs E., Wagner H. 2019. *vegan: Community Ecology*  
606 *Package*. R package version 2.5-4. <https://CRAN.R-project.org/package=vegan>.
- 607 Paradis E., Schliep K. 2018. *ape 5.0: an environment for modern phylogenetics and evolutionary analyses*  
608 *in R*. *Bioinformatics*, 35:526-528.
- 609 Parry L.A., Edgecombe G.D., Eibye-Jacobsen D., Vinther J. 2016. The impact of fossil data on annelid  
610 phylogeny inferred from discrete morphological characters. *Proc. Roy. Soc. B Biol. Sci.* 283:20161378.
- 611 Patterson C. 1977. The contribution of paleontology to teleostean phylogeny. In: *Major patterns in*  
612 *vertebrate evolution*. Hecht M.K., Goody P.C., Hecht B.M. Eds. New York: Plenum Press, p. 579-643.
- 613 Patterson C. 1981. Significance of fossils in determining evolutionary relationships. *Annu. Rev. Ecol.*  
614 *Syst.* 12:195-223.
- 615 Pattinson D.J., Thompson R.S., Piotrowski A.K., Asher R.J. 2014. Phylogeny, paleontology, and  
616 primates: do incomplete fossils bias the tree of life? *Syst. Biol.* 64:169-186.
- 617 Penny D., Hendy M. 1985. The use of tree comparison metrics. *Syst. Zool.* 34:75-82.
- 618 Philippe H., Poustka A.J., Chiodin M., Hoff K.J., Dessimoz C., Tomiczek B., Schiffer P.H., Müller S.,  
619 Domman D., Horn M. 2019. Mitigating anticipated effects of systematic errors supports sister-group  
620 relationship between Xenacoelomorpha and Ambulacraria. *Curr. Biol.* 29:1818-1826.

## EXPLORING THE TOPOLOGICAL EFFECT OF FOSSILS

- 621 Prevosti F.J., Chemisquy M.A. 2010. The impact of missing data on real morphological phylogenies:  
622 influence of the number and distribution of missing entries. *Cladistics* 26:326-339.
- 623 Puttick M.N. 2016. Partially incorrect fossil data augment analyses of discrete trait evolution in living  
624 species. *Biol. Lett.* 12:20160392.
- 625 Puttick M.N., O'Reilly J.E., Pisani D., Donoghue P.C. 2019. Probabilistic methods outperform parsimony  
626 in the phylogenetic analysis of data simulated without a probabilistic model. *Palaeontology* 62:1-17.
- 627 Puttick M.N., O'Reilly J.E., Tanner A.R., Fleming J.F., Clark J., Holloway L., Lozano-Fernandez J., Parry  
628 L.A., Tarver J.E., Pisani D. 2017. Uncertain-tree: discriminating among competing approaches to the  
629 phylogenetic analysis of phenotype data. *Proc. Roy. Soc. B Biol. Sci.* 284:20162290.
- 630 Quental T.B., Marshall C.R. 2010. Diversity dynamics: molecular phylogenies need the fossil record.  
631 *Trends Ecol. Evol.* 25:434-441.
- 632 Rabosky D.L. 2010. Extinction rates should not be estimated from molecular phylogenies. *Evolution*  
633 64:1816-1824.
- 634 Raup D.M. 1992. *Extinction: bad genes or bad luck?* WW Norton & Company.
- 635 Robinson D.F., Foulds L.R. 1981. Comparison of phylogenetic trees. *Math. Biosci.* 53:131-147.
- 636 Ronquist F., Klopfstein S., Vilhelmsen L., Schulmeister S., Murray D.L., Rasnitsyn A.P. 2012a. A Total-  
637 Evidence Approach to Dating with Fossils, Applied to the Early Radiation of the Hymenoptera. *Syst.*  
638 *Biol.* 61:973-999.
- 639 Ronquist F., Teslenko M., Van Der Mark P., Ayres D.L., Darling A., Höhna S., Larget B., Liu L.,  
640 Suchard M.A., Huelsenbeck J.P. 2012b. MrBayes 3.2: efficient Bayesian phylogenetic inference and  
641 model choice across a large model space. *Syst. Biol.* 61:539-542.
- 642 Sansom R.S., Choate P.G., Keating J.N., Randle E. 2018. Parsimony, not Bayesian analysis, recovers  
643 more stratigraphically congruent phylogenetic trees. *Biol. Lett.* 14:20180263.
- 644 Sansom R.S., Wills M.A. 2013. Fossilization causes organisms to appear erroneously primitive by  
645 distorting evolutionary trees. *Sci. Rep.* 3:2545.

N Mongiardino Koch & LA Parry

- 646 Sansom R.S., Wills M.A. 2017. Differences between hard and soft phylogenetic data. *Proc. Roy. Soc. B*  
647 *Biol. Sci.* 284:20172150.
- 648 Sansom R.S., Wills M.A., Williams T. 2017. Dental data perform relatively poorly in reconstructing  
649 mammal phylogenies: morphological partitions evaluated with molecular benchmarks. *Syst. Biol.* 66:813-  
650 822.
- 651 Schliep K.P. 2011. phangorn: phylogenetic analysis in R. *Bioinformatics* 27:592.
- 652 Schnitzler J., Theis C., Polly P.D., Eronen J.T. 2017. Fossils matter—understanding modes and rates of  
653 trait evolution in Musteloidea (Carnivora). *Evol. Ecol. Res.* 18:187-200.
- 654 Schrago C.G., Aguiar B.O., Mello B. 2018. Comparative evaluation of maximum parsimony and  
655 Bayesian phylogenetic reconstruction using empirical morphological data. *J. Evol. Biol.* 31:1477-1484.
- 656 Scotland R.W., Olmstead R.G., Bennett J.R. 2003. Phylogeny reconstruction: the role of morphology.  
657 *Syst. Biol.* 52:539-548.
- 658 Simões T.R., Caldwell M.W., Tałanda M., Bernardi M., Palci A., Vernygora O., Bernardini F., Mancini  
659 L., Nydam R.L. 2018. The origin of squamates revealed by a Middle Triassic lizard from the Italian Alps.  
660 *Nature* 557:706.
- 661 Simpson G.G. 1952. How many species? *Evolution* 6:342-342.
- 662 Slater G.J., Harmon L.J. 2013. Unifying fossils and phylogenies for comparative analyses of  
663 diversification and trait evolution. *Methods Ecol. Evol.* 4:699-702.
- 664 Slater G.J., Harmon L.J., Alfaro M.E. 2012. Integrating fossils with molecular phylogenies improves  
665 inference of trait evolution. *Evolution* 66:3931-3944.
- 666 Smith A.B. 1994. *Systematics and the fossil record: documenting evolutionary patterns*. John Wiley &  
667 Sons.
- 668 Smith A.B. 1998. What does palaeontology contribute to systematics in a molecular world? *Mol.*  
669 *Phylogenet. Evol.* 9:437-447.
- 670 Smith M.R. 2019. Bayesian and parsimony approaches reconstruct informative trees from simulated  
671 morphological datasets. *Biol. Lett.* 15:20180632.

## EXPLORING THE TOPOLOGICAL EFFECT OF FOSSILS

- 672 Smith N.D., Turner A.H. 2005. Morphology's role in phylogeny reconstruction: perspectives from  
673 paleontology. *Syst. Biol.* 54:166-173.
- 674 Spaulding M., O'Leary M.A., Gatesy J. 2009. Relationships of Cetacea (Artiodactyla) among mammals:  
675 increased taxon sampling alters interpretations of key fossils and character evolution. *PLoS One* 4:e7062.
- 676 Springer M.S., Burk-Herrick A., Meredith R., Eizirik E., Teeling E., O'Brien S.J., Murphy W.J. 2007. The  
677 adequacy of morphology for reconstructing the early history of placental mammals. *Syst. Biol.* 56:673-  
678 684.
- 679 Sumrall C.D. 1997. The role of fossils in the phylogenetic reconstruction of Echinodermata. *The*  
680 *Paleontological Society Papers*, 3:267-288.
- 681 R Core Team. 2019. R: A Language and Environment for Statistical Computing. Vienna, Austria, R  
682 Foundation for Statistical Computing. <https://www.R-project.org/>.
- 683 Veà I.M., Grimaldi D.A. 2015. Diverse new scale insects (Hemiptera: Coccoidea) in amber from the  
684 Cretaceous and Eocene with a phylogenetic framework for fossil Coccoidea. *Am. Mus. Nov.* 2015:1-16.
- 685 Wiens J.J. 2003a. Incomplete taxa, incomplete characters, and phylogenetic accuracy: is there a missing  
686 data problem? *J. Vert. Paleontol.* 23:297-310.
- 687 Wiens J.J. 2003b. Missing data, incomplete taxa, and phylogenetic accuracy. *Syst. Biol.* 52:528-538.
- 688 Wiens J.J. 2005. Can incomplete taxa rescue phylogenetic analyses from long-branch attraction? *Syst.*  
689 *Biol.* 54:731-742.
- 690 Wiens J.J., Kuczynski C.A, Townsend T., Reeder T.W., Mulcahy D.G., Sites Jr J.W. 2010. Combining  
691 phylogenomics and fossils in higher-level squamate reptile phylogeny: molecular data change the  
692 placement of fossil taxa. *Syst. Biol.* 59:674-688.
- 693 Wills M.A., Fortey R.A. 2000. The shape of life: how much is written in stone? *BioEssays* 22:1142-1152.
- 694 Wilson M.V. 1992. Importance for phylogeny of single and multiple stem-group fossil species with  
695 examples from freshwater fishes. *Syst. Biol.* 41:462-470.

N Mongiardino Koch & LA Parry

- 696 Wood H.M., Matzke N.J., Gillespie R.G., Griswold C.E. 2012. Treating fossils as terminal taxa in  
697 divergence time estimation reveals ancient vicariance patterns in the palpimanoid spiders. *Syst. Biol.*  
698 62:264-284.
- 699 Wright A.M., Hillis D.M. 2014. Bayesian analysis using a simple likelihood model outperforms  
700 parsimony for estimation of phylogeny from discrete morphological data. *PLoS One* 9:e109210.
- 701 Zhang C., Stadler T., Klopstein S., Heath T.A., Ronquist F. 2016. Total-evidence dating under the  
702 fossilized birth–death process. *Systematic biology*, 65:228-249.

## EXPLORING THE TOPOLOGICAL EFFECT OF FOSSILS

703 **Table 1.** Morphological matrices employed differ in taxonomic scope, character coding strategies and  
704 size.

| <b>Dataset</b>                                                                              | <b>Number of<br/>ingroup taxa</b> | <b>Percentage<br/>of fossils</b> | <b>Number of<br/>characters</b> | <b>Percentage of multistate<br/>– ordered characters</b> | <b>Percentage of missing<br/>data (extant – fossil)</b> |
|---------------------------------------------------------------------------------------------|-----------------------------------|----------------------------------|---------------------------------|----------------------------------------------------------|---------------------------------------------------------|
| Cocomorpha (Vea and Grimaldi 2015)                                                          | 116                               | 37.1                             | 174                             | 50.6 – 0.0                                               | 23.8 – 50.2                                             |
| Echinoidea (Kroh and Smith 2010)                                                            | 163                               | 55.8                             | 303                             | 34.0 – 5.3                                               | 17.5 – 28.0                                             |
| Lemuriformes (Herrera and Dávalos 2016)                                                     | 62                                | 32.3                             | 421                             | 69.1 – 0.0                                               | 44.0 – 71.1                                             |
| Mammalia (O’Leary et al. 2013)                                                              | 83                                | 44.6                             | 4541                            | 21.2 – 0.0                                               | 39.4 – 65.8                                             |
| Panarthropoda (Legg et al. 2013)                                                            | 309                               | 69.2                             | 753                             | 14.2 – 0.0                                               | 55.2 – 76.1                                             |
| Squamata (unpublished, based on (Gauthier et al. 2012, Mongiardino Koch and Gauthier 2018)) | 198                               | 28.3                             | 767                             | 35.3 – 23.9                                              | 32.0 – 62.6                                             |

705

706

N Mongiardino Koch & LA Parry

707 **Figure 1:** Protocol for the assessment of topological impact. **1.** Matrices were subsampled to a fixed  
708 number ( $n$ ) of extant taxa plus one outgroup (OG). 25 such initial replicates were built from each dataset.  
709 **2.** A given number ( $m$ ) of terminals were added to these initial replicates. These were composed entirely  
710 of extant (top, blue), fossil (bottom, orange), or pseudoextinct taxa (not shown). Three iterations of taxon  
711 addition were performed. **3.** Matrices were subject to phylogenetic analysis under maximum parsimony  
712 (MP) and Bayesian inference (BI), resulting in a set of optimal topologies from which at most 100 were  
713 sampled at random (represented here by a single tree). **4.** Topologies obtained after taxon addition were  
714 pruned to match the taxon sampling of the initial replicate. **5.** Topologies were compared using Robinson-  
715 Foulds (RF) distances. Further rounds of addition of  $m$  terminals were performed on the matrices  
716 resulting from step 2, followed by the same subsequent steps. The values of  $n$  and  $m$  were determined for  
717 each dataset as explained in the SI File 2. The same color scheme is used throughout.

718

719 **Figure 2:** Comparison of the topological impact of fossil (orange) and extant (blue) terminals. Each dot is  
720 the topological distance (average RF distance to nearest neighbor) between trees before and after the  
721 addition of groups of either extant or fossil terminals, averaged across iterations. Regression lines are  
722 shown for the best-fit linear model. When the lines are parallel, the interaction term was not significant.  
723 Regions of significance are shown above each plot (the entire range is marked in the absence of a  
724 significant interaction). Silhouettes were taken from PhyloPic (<http://phylopic.org/>), and will be used  
725 throughout.

726

727 **Figure 3:** Comparison of the topological impact of fossil (orange) and pseudoextinct (green) terminals.  
728 Analysis of the data is performed as in Figure 2.

729



## EXPLORING THE TOPOLOGICAL EFFECT OF FOSSILS

730 **Figure 4:** Comparison of the topological impact of paleontological (orange) and neontological (blue)  
731 data. Analysis of the data is performed as in Figure 2, although the continuous predictor employed is the  
732 logarithm of the amount of information added to the inference procedure (averaged across iterations).

733

734 **Figure 5:** Topological changes induced by the addition of paleontological and neontological data to trees  
735 of extant terminals. A single treespace per replicate was generated, summarizing the position of trees  
736 obtained after incorporating increasing numbers of extant (blue) and fossil (orange) terminals. Treespaces  
737 for each dataset were then rotated to maximize superimposition, and translated so that the topologies  
738 product of the initial replicate (that obtained before any terminal is added, see Fig. 1, step 2) is at the  
739 origin. Dot size scales with the number of added terminals.

740

741 **Figure 6:** Exploring the determinants of topological impact under MP. **a)** Both missing data, type of taxa  
742 (fossil/extant) and their interaction plays a role in determining the topological effect of individual  
743 terminals. Across most of the region of missing data for which extant (blue) and fossil (orange) taxa  
744 overlap, fossils have a significantly higher topological impact (see also Fig. S7 of SI File 3). **b)** Effect size  
745 of the significant determinants of topological impact. Variables are ordered (top to bottom) according to  
746 the order in which they are incorporated into the stepwise linear model. Variables with an asterisk were  
747 also found to be significant determinants under BI (Fig. S8 of SI File 3). Effect sizes are standardized to  
748 reflect expected changes generated by a difference of one standard deviation.

749

N Mongiardino Koch & LA Parry

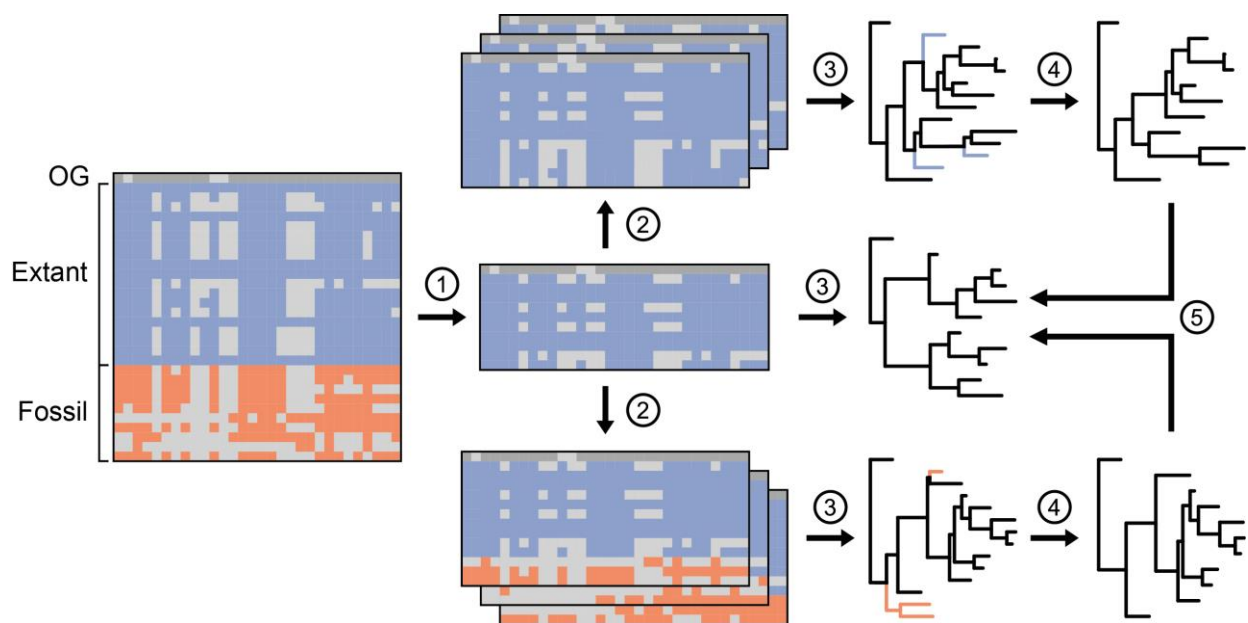

750

751

## EXPLORING THE TOPOLOGICAL EFFECT OF FOSSILS

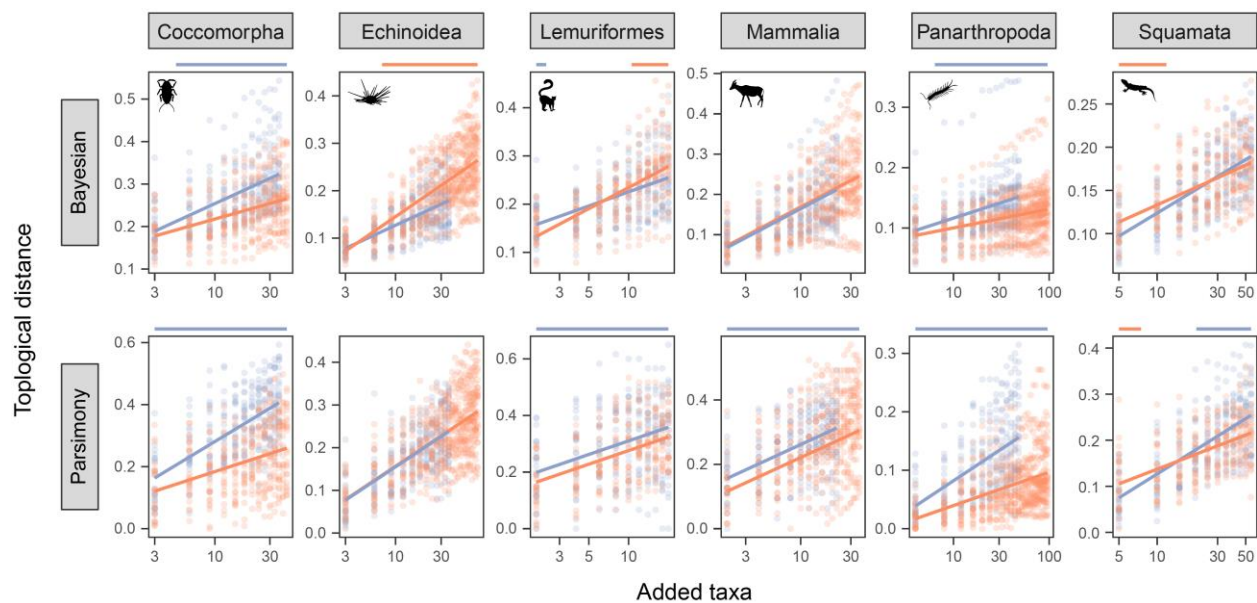

752

753

N Mongiardino Koch & LA Parry

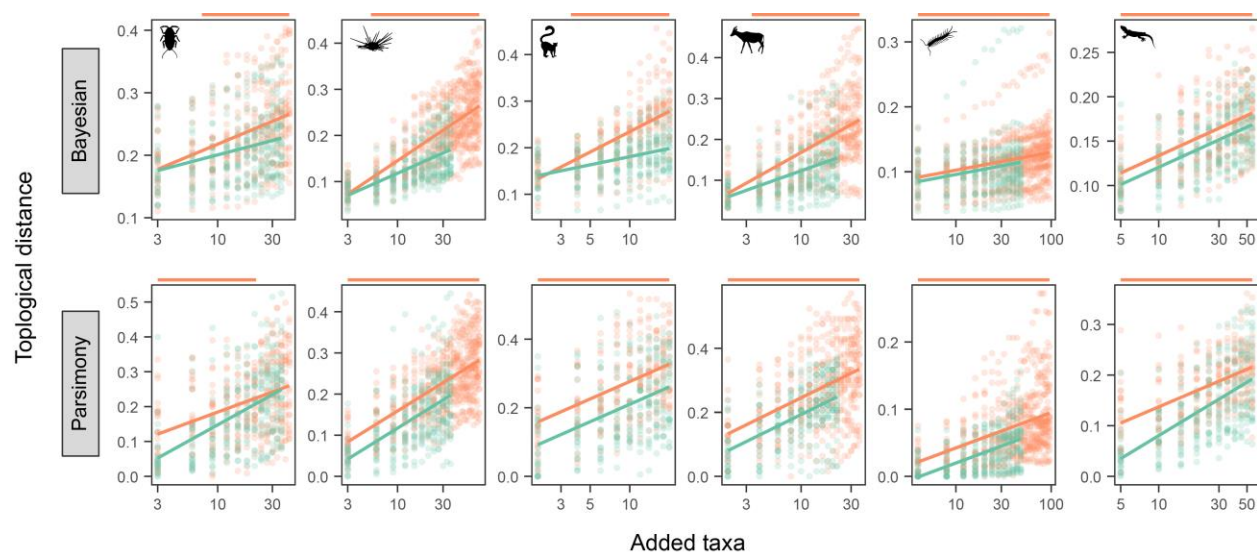

754

755

## EXPLORING THE TOPOLOGICAL EFFECT OF FOSSILS

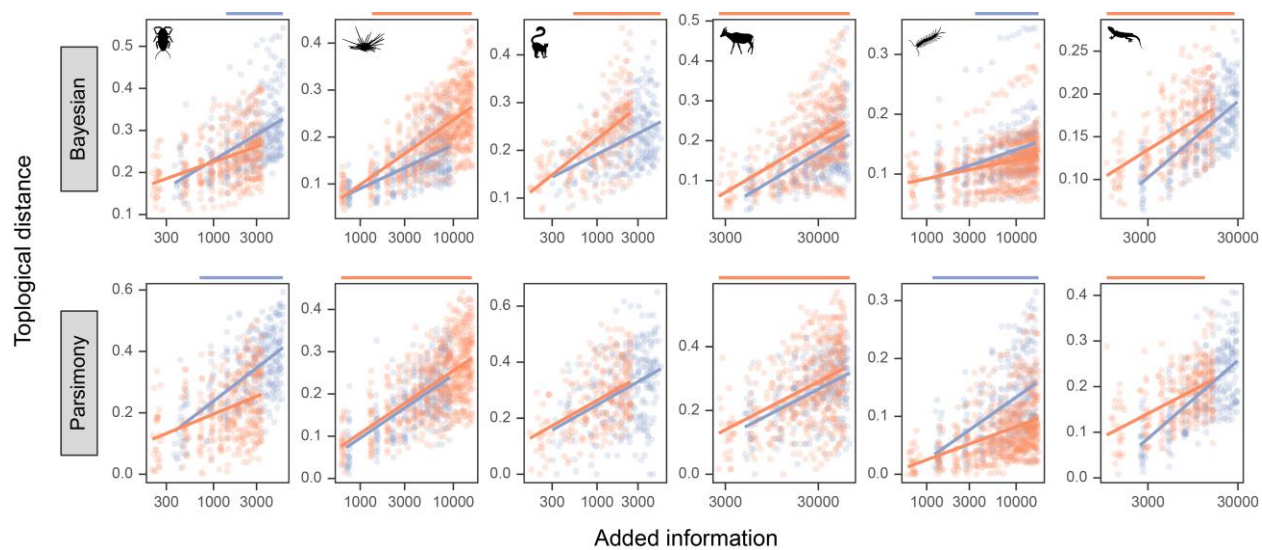

756

757

N Mongiardino Koch & LA Parry

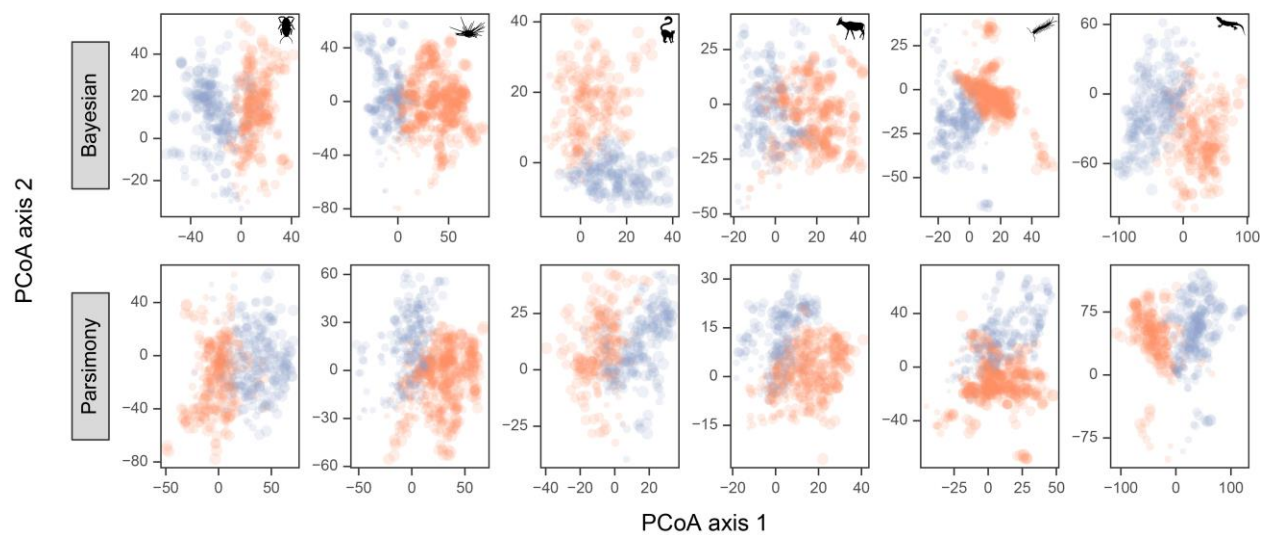

758

759

## EXPLORING THE TOPOLOGICAL EFFECT OF FOSSILS

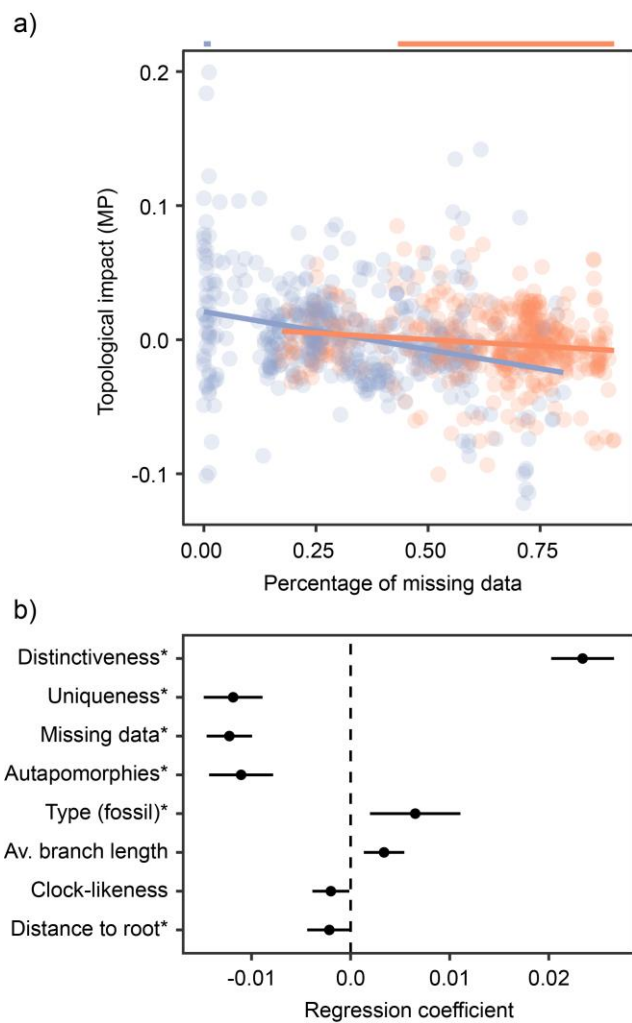

760
